# Supplementary material for: Impact of selenium supplementation on fish antiviral responses: a whole transcriptomic analysis in rainbow trout (Oncorhynchus mykiss) fed supranutritional levels of Sel-Plex®
Source: PubMed Central journal article supplement (PMC4754912; doi:10.1186/s12864-016-2418-7), 2016-02-16

**Additional File 1: Figure S1. Diagram outlining the experimental setup and hybridization strategy for microarray analysis.** For each experimental group five pools of HK or liver RNA extracted from three individuals were used. For the microarray experiment, the effect of the 4 mg Se Kg<sup>-1</sup> diet (SeC), plus the effect of poly(I:C) stimulation on fish fed either a control diet (CP) or the 4 mg Se Kg<sup>-1</sup> enriched diet (SeP) was investigated, in both liver and head kidney. One-way ANOVA was used to compare differences among groups, whilst two-way ANOVA analysis was applied to determine differential responses to poly(I:C) between the two diet groups. The pooled control was an equal mixture of RNA pools from each group. All hybridizations were between experimental groups and the pooled control.

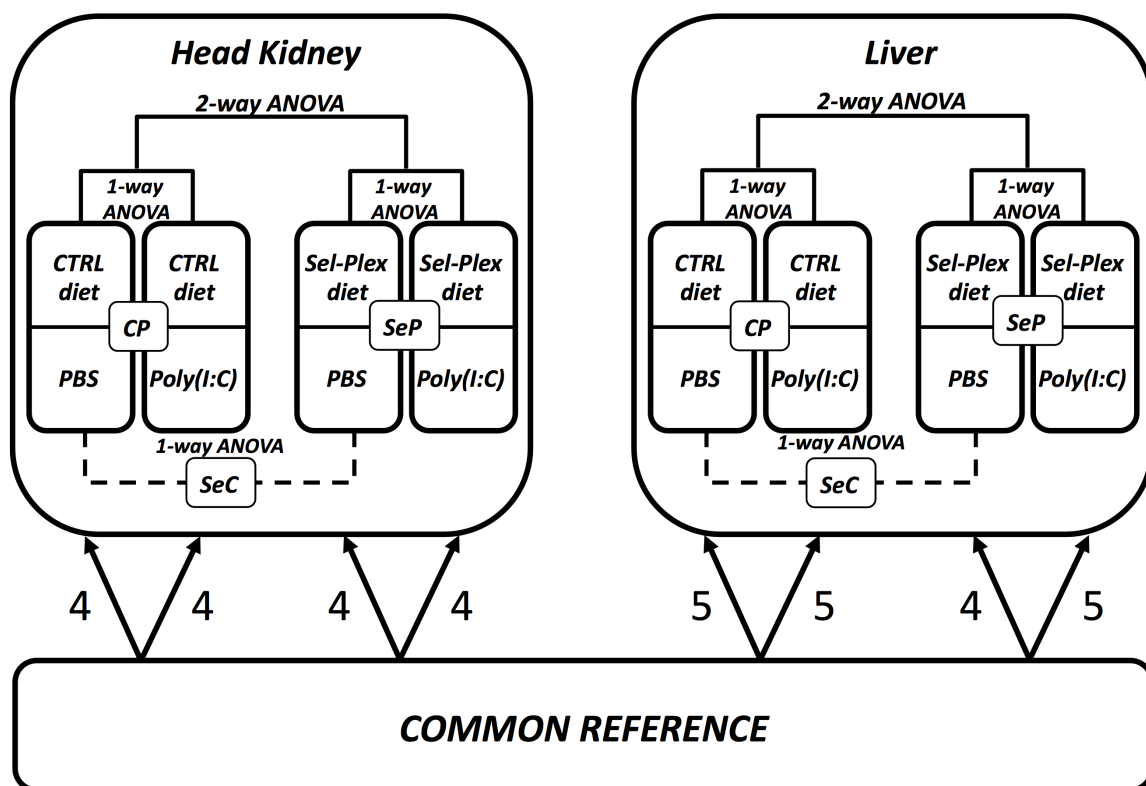

Supplement: 12864_2016_2418_MOESM1_ESM.pdf [file 12864_2016_2418_MOESM1_ESM.pdf]
