# Supplementary material for: Impact of selenium supplementation on fish antiviral responses: a whole transcriptomic analysis in rainbow trout (Oncorhynchus mykiss) fed supranutritional levels of Sel-Plex®
Source: PubMed Central journal article supplement (PMC4754912; doi:10.1186/s12864-016-2418-7), 2016-02-16
Supplement: 12864_2016_2418_MOESM3_ESM.pdf [file 12864_2016_2418_MOESM3_ESM.pdf]

**Additional File 3: Table S1. Vitamin and mineral composition in the raw material for all diets used in this study.**

| <b>Vitamins and minerals</b>          | <b>µg/mg premix</b> |
|---------------------------------------|---------------------|
| <i>Vitamin A</i>                      | 0                   |
| <i>Vitamin D3</i>                     | 0                   |
| <i>Vitamin E</i>                      | 58.33               |
| <i>Vitamin B1</i>                     | 3.33                |
| <i>Vitamin B2</i>                     | 6.67                |
| <i>Vitamin B6</i>                     | 3.33                |
| <i>Vitamin B12 (ng/mg)</i>            | 0.01                |
| <i>Vitamin K3</i>                     | 3.33                |
| <i>Vitamin PP (Niacine)</i>           | 16.67               |
| <i>Vitamin B3 (Ca D Panthothenic)</i> | 13.33               |
| <i>Biotin</i>                         | 0.1                 |
| <i>Vitamin C</i>                      | 33.33               |
| <i>Folic acid</i>                     | 3.33                |
| <i>Ethoxyquin</i>                     | 0                   |
| <i>Zinc</i>                           | 33.33               |
| <i>Iodine</i>                         | 0.4                 |
| <i>Copper</i>                         | 0                   |
| <i>Manganese</i>                      | 10                  |
| <i>Cobalt</i>                         | 0.33                |
| <i>Selenium mineral</i>               | 0                   |
