# Supplementary material for: Impact of selenium supplementation on fish antiviral responses: a whole transcriptomic analysis in rainbow trout (Oncorhynchus mykiss) fed supranutritional levels of Sel-Plex®
Source: PubMed Central journal article supplement (PMC4754912; doi:10.1186/s12864-016-2418-7), 2016-02-16
Supplement: 12864_2016_2418_MOESM4_ESM.pdf [file 12864_2016_2418_MOESM4_ESM.pdf]

**Additional File 4: Table S2. Real time *q*PCR analysis of genes selected for confirmation of microarray data.** Candidate transcripts expression in HK (A) and liver (B) RNA isolated from rainbow trout fed a control diet (CTRL) or a diet enriched with 4 mg Se Kg<sup>-1</sup> (Sel-Plex), and injected with either PBS or poly(I:C). The expression of gene transcripts was quantified by *q*PCR and normalized against the geometric mean of three housekeeping genes (*ef-1 $\alpha$* , *drpII*, *hprt*) from the same samples, and then used for statistical analysis. The transcript expression is reported as a fold change, calculated as the average expression level of stimulated samples divided by that of the controls. The results represent the mean  $\pm$  SEM from five pools of HK or liver RNA extracted from 3 individuals from 3 different tanks. The letters above the columns indicate values that are statistically significant vs the controls ( $p < 0.05$ ) in the group injected with poly(I:C), with different letters indicating significant differences between the two diet regimes. Asterisks indicate values that are statistically significant vs the control ( $p < 0.05$ ) in the group fed 4 mg Se Kg<sup>-1</sup> and injected with PBS. The primers used are listed in Table 2.

**A**

|                    | IFN $\gamma$ 2       |                                            | MX2        |                                             | SOCS3      |                                | CATH1      |                                            | TrxR3b              |                                           | SelPa               |                                             |
|--------------------|----------------------|--------------------------------------------|------------|---------------------------------------------|------------|--------------------------------|------------|--------------------------------------------|---------------------|-------------------------------------------|---------------------|---------------------------------------------|
|                    | Microarray           | <i>q</i> PCR                               | Microarray | <i>q</i> PCR                                | Microarray | <i>q</i> PCR                   | Microarray | <i>q</i> PCR                               | Microarray          | <i>q</i> PCR                              | Microarray          | <i>q</i> PCR                                |
|                    | CUST_201_P1429021944 |                                            | TC149586   |                                             | IM M 590   |                                | IM M 568   |                                            | CUST_56_P1429042546 |                                           | CUST_38_P1429042546 |                                             |
| Sel-Plex/Poly(I:C) | 19.2                 | <b>31.2<math>\pm</math>4.7<sup>a</sup></b> | 28.6       | <b>42.4<math>\pm</math>12.8<sup>a</sup></b> | 14.8       | <b>18.0<math>\pm</math>4.9</b> | 13.2       | <b>22.8<math>\pm</math>4.9</b>             | 2.6                 | <b>2.3<math>\pm</math>0.2<sup>a</sup></b> | -2.5                | <b>-2.5<math>\pm</math>0.01<sup>a</sup></b> |
| CTRL/Poly(I:C)     | 5.9                  | <b>12<math>\pm</math>2.2<sup>b</sup></b>   | 25.5       | <b>35.2<math>\pm</math>3.0<sup>a</sup></b>  | 11.7       | <b>32.6<math>\pm</math>6.8</b> | 7.6        | <b>11.9<math>\pm</math>4.9<sup>a</sup></b> | 2.2                 | <b>3.3<math>\pm</math>0.1<sup>a</sup></b> | -2.1                | <b>-2.1<math>\pm</math>0.01<sup>a</sup></b> |
| Sel-Plex/PBS       | -1.2                 | <b>-1.4<math>\pm</math>0.1</b>             | -1.0       | <b>0.7<math>\pm</math>0.1</b>               | 1.5        | <b>1.4<math>\pm</math>0.3</b>  | -1.7       | <b>-1.2<math>\pm</math>0.1</b>             | 1.1                 | <b>1.23<math>\pm</math>0.1</b>            | 1.0                 | <b>1.2<math>\pm</math>0.1</b>               |

**B**

|                    | IFN1 $\alpha$ |                                           | VIG-1      |                                            | SAA        |                                              | HAMP                |                                            | IGFBP-1b           |                                              | SelPb               |                                             |
|--------------------|---------------|-------------------------------------------|------------|--------------------------------------------|------------|----------------------------------------------|---------------------|--------------------------------------------|--------------------|----------------------------------------------|---------------------|---------------------------------------------|
|                    | Microarray    | <i>q</i> PCR                              | Microarray | <i>q</i> PCR                               | Microarray | <i>q</i> PCR                                 | Microarray          | <i>q</i> PCR                               | Microarray         | <i>q</i> PCR                                 | Microarray          | <i>q</i> PCR                                |
|                    | TC138564      |                                           | TC136044   |                                            | TC P 675   |                                              | CUST_B3_P1429021944 |                                            | CUST_2_P1429021970 |                                              | CUST_39_P1429042546 |                                             |
| Sel-Plex/Poly(I:C) | 2.6           | <b>3.0<math>\pm</math>0.3<sup>a</sup></b> | 31.7       | <b>84.3<math>\pm</math>6.1<sup>a</sup></b> | 82.1       | <b>178.9<math>\pm</math>44.7<sup>a</sup></b> | 13.8                | <b>8.8<math>\pm</math>1.0<sup>a</sup></b>  | -9.1               | <b>-33.3<math>\pm</math>0.01<sup>a</sup></b> | -2.0                | <b>-2.9<math>\pm</math>0.03<sup>a</sup></b> |
| CTRL/Poly(I:C)     | 2.3           | <b>2.6<math>\pm</math>0.1<sup>a</sup></b> | 33.5       | <b>83.4<math>\pm</math>4.5<sup>a</sup></b> | 37.6       | <b>109.6<math>\pm</math>33.5<sup>a</sup></b> | 7.0                 | <b>33.2<math>\pm</math>7.1<sup>b</sup></b> | -9.4               | <b>-25<math>\pm</math>0.01<sup>a</sup></b>   | -2.1                | <b>-2.2<math>\pm</math>0.06<sup>a</sup></b> |
| Sel-Plex/PBS       | 1.1           | <b>1.1<math>\pm</math>0.1</b>             | 1.3        | <b>1.4<math>\pm</math>0.4</b>              | -1.7       | <b>-1.92<math>\pm</math>0.1</b>              | 2.0                 | <b>3.3<math>\pm</math>1.3</b>              | 1.6                | <b>-2.1<math>\pm</math>0.3*</b>              | 1.1                 | <b>1.2<math>\pm</math>0.1</b>               |
