# Supplementary material for: Impact of selenium supplementation on fish antiviral responses: a whole transcriptomic analysis in rainbow trout (Oncorhynchus mykiss) fed supranutritional levels of Sel-Plex®
Source: PubMed Central journal article supplement (PMC4754912; doi:10.1186/s12864-016-2418-7), 2016-02-16
Supplement: 12864_2016_2418_MOESM7_ESM.pdf [file 12864_2016_2418_MOESM7_ESM.pdf]

**Additional File 7: Table S5. List of selenoprotein transcripts significantly modulated.** All the selenoprotein transcripts modulated in the HK and liver of fish fed the experimental diet enriched with 4 g Kg<sup>-1</sup> Sel-Plex and injected with PBS, of fish injected with poly(I:C) and fed the experimental diet enriched with 4 g Kg<sup>-1</sup> Sel-Plex and the control diet respectively, are given. All the transcripts shown were significantly modulated ( $p < 0.05$ ) following the Benjamini–Hochberg correction and had a fold change  $\geq 2$ . Accession numbers of the cDNA sequences<sup>6</sup>, their identity<sup>7</sup> and the corresponding human orthologue<sup>8</sup> determined by BLASTx and BLASTn are reported. SeC represents the groups comparison addressed to analyse the effects of the 4 g Kg<sup>-1</sup> Sel-Plex diet. CP and SeP instead represent the comparisons addressed to analyse the effect of poly(I:C) stimulation on fish fed either a control diet or the 4 g Kg<sup>-1</sup> Sel-Plex respectively.

| Trait <sup>1</sup> Identifier | SeC <sup>2</sup> | CP <sup>3</sup> | CP <sup>4</sup> | Acc. Number <sup>5</sup> | Identity <sup>6</sup>                    | HGNC symbol <sup>7</sup> |
|-------------------------------|------------------|-----------------|-----------------|--------------------------|------------------------------------------|--------------------------|
| <b>HK</b>                     |                  |                 |                 |                          |                                          |                          |
| CUSR_21_PI                    | 1.0              | -4.7            | -4.3            | not-annotated            | Type I iodothyronine deiodinase          | DIO1                     |
| TC133469                      | -1.1             | 2.2             | 1.9             | NM_0011245               | Glutathione peroxidase type 2            | GPX2                     |
| CUST_38_PI                    | 1.0              | -2.1            | -2.0            | HF969249                 | Selenoprotein Pa                         | SEPP1                    |
| TC164235                      | 1.1              | 2.7             | 2.3             | BT072601                 | Thioredoxine reductase 1                 | TXNRD1                   |
| <b>Liver</b>                  |                  |                 |                 |                          |                                          |                          |
| TC134139                      | -1.3             | -5.6            | -4.7            | AF207900                 | Type II iodothyronine deiodinase         | DIO2                     |
| TC132596                      | 1.4              | -2.2            | -1.5            | NM_0011245               | Glutathione peroxidase type 2            | GPX2                     |
| CUST_39_PI                    | 1.2              | -2.1            | -2.0            | HF969250                 | Selenoprotein Pb                         | SEPP1                    |
| TC154252                      | 1.2              | -2.1            | -1.7            | BT045754                 | tRNA selenocysteine-associated protein 1 | TRNAU1AP                 |
